# Supplementary material for: Red and processed meat consumption and risk of bladder cancer: a dose–response meta-analysis of epidemiological studies
Source: PubMed Central journal article supplement (PMC5845591; doi:10.1007/s00394-016-1356-0), 2016-12-22

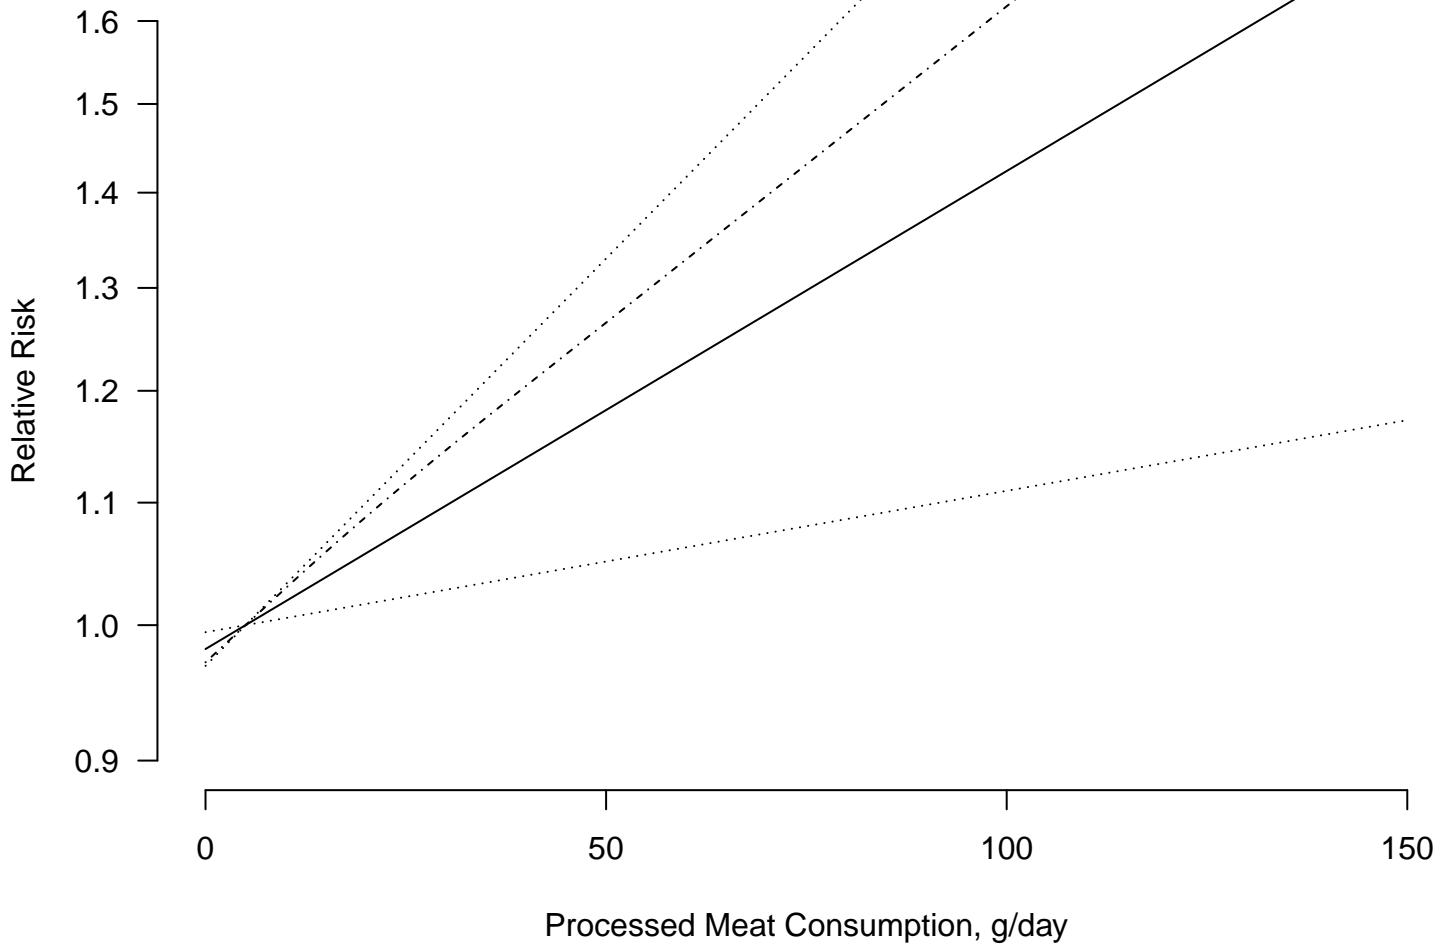

Supplement: 394_2016_1356_MOESM2_ESM.pdf [file 394_2016_1356_MOESM2_ESM.pdf]
